# Supplementary material for: Three dimensional hierarchically porous crystalline MnO2 structure design for a high rate performance lithium-ion battery anode
Source: Royal Society of Chemistry journal article supplement (doi:10.1039/c6ra16430g), 2016-01-01
Supplement: c6ra16430g1.pdf [file c6ra16430g1.pdf]

## Supporting Information

### **Three dimensional hierarchically porous crystalline MnO<sub>2</sub> structure design for high rate performance lithium-ion battery anode**

Shikun Liu,<sup>a</sup> Xusong Liu,<sup>a</sup> Jiupeng Zhao,<sup>\*a</sup> Zhongqiu Tong,<sup>b</sup> Jing Wang,<sup>a</sup> Xiaoxuan Ma,<sup>a</sup> Caixia Chi,<sup>a</sup> Dapeng Su,<sup>a</sup> Xiaoxu Liu,<sup>\*ac</sup> Yao Li,<sup>\*b</sup>

*a* MIIT Key Laboratory of Critical Materials Technology for New Energy Conversion and Storage, School of Chemistry and Chemical Engineering, Harbin Institute of Technology, Harbin 150001, PR China

*b* Center for Composite Materials Harbin Institute of Technology, Harbin 150001, PR China

*c* Heilongjiang University of Science and Technology, Harbin 150022, PR China

*\*Corresponding authors. E-mail: jpzhao@hit.edu.cn; liu88062321@163.com; yaoli@hit.edu.cn*

### Electrodeposited Processes of Manganese Dioxide:

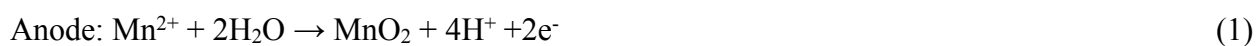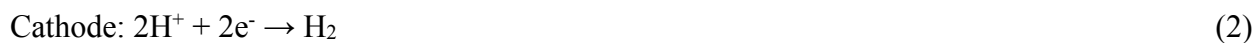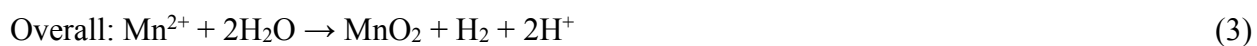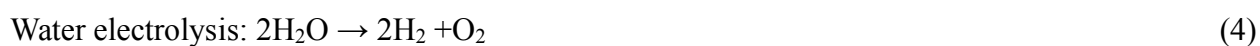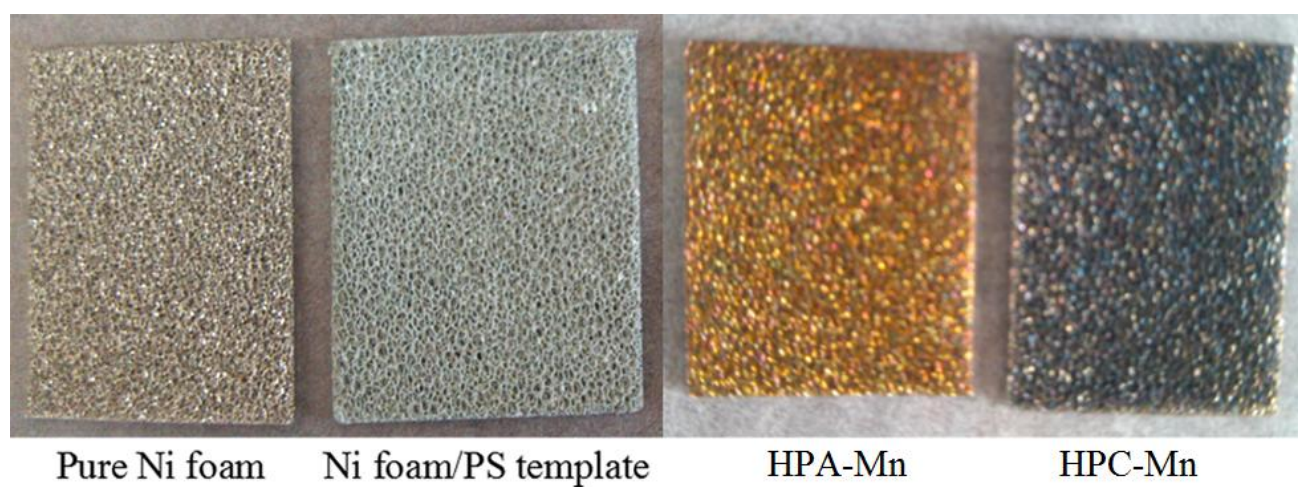

**Fig. S1** Optical image of Ni foam substrate, Ni foam/PS template, HPA-Mn and HPC-Mn samples directly grown on Ni foam.

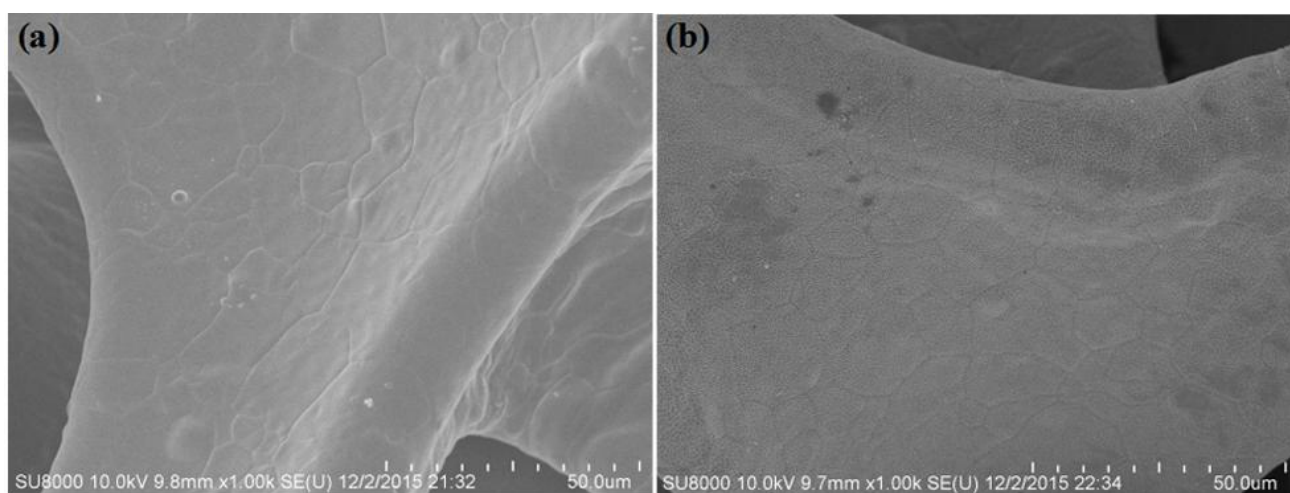

**Fig. S2** Low resolution SEM images of (a) pure Ni foam and (b) HPC-Mn sample.

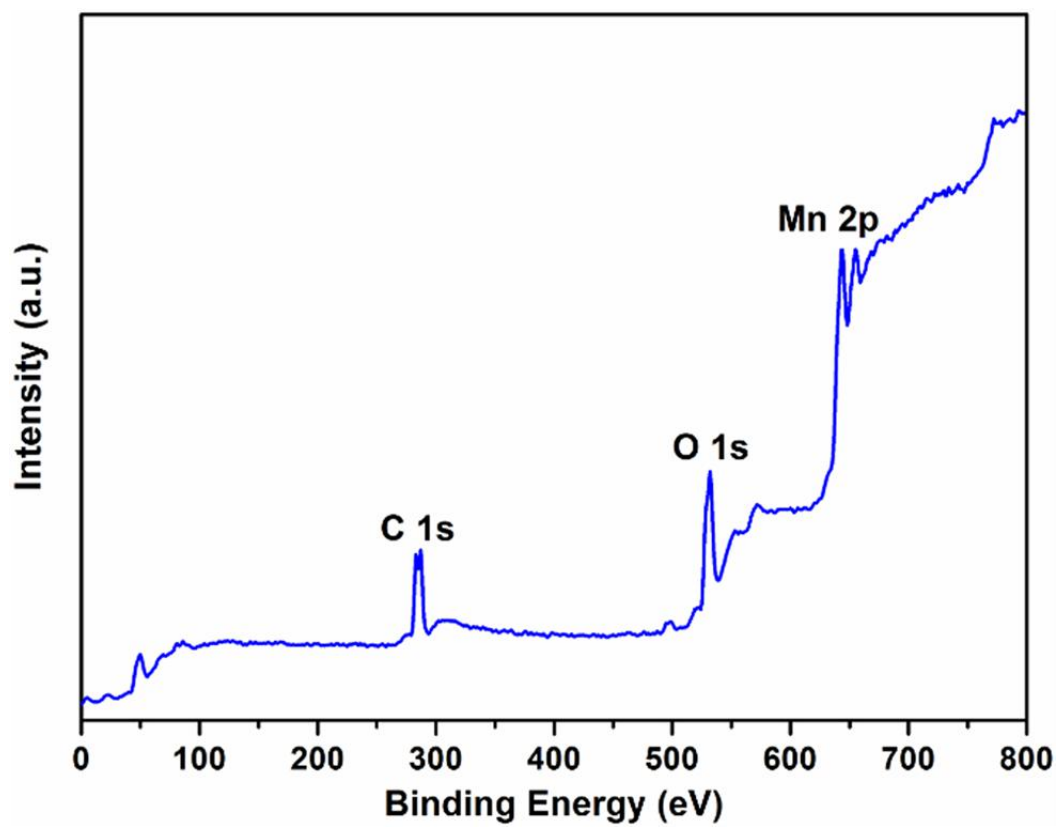

**Fig. S3** The wide scan XPS spectrum of HPC-Mn sample.

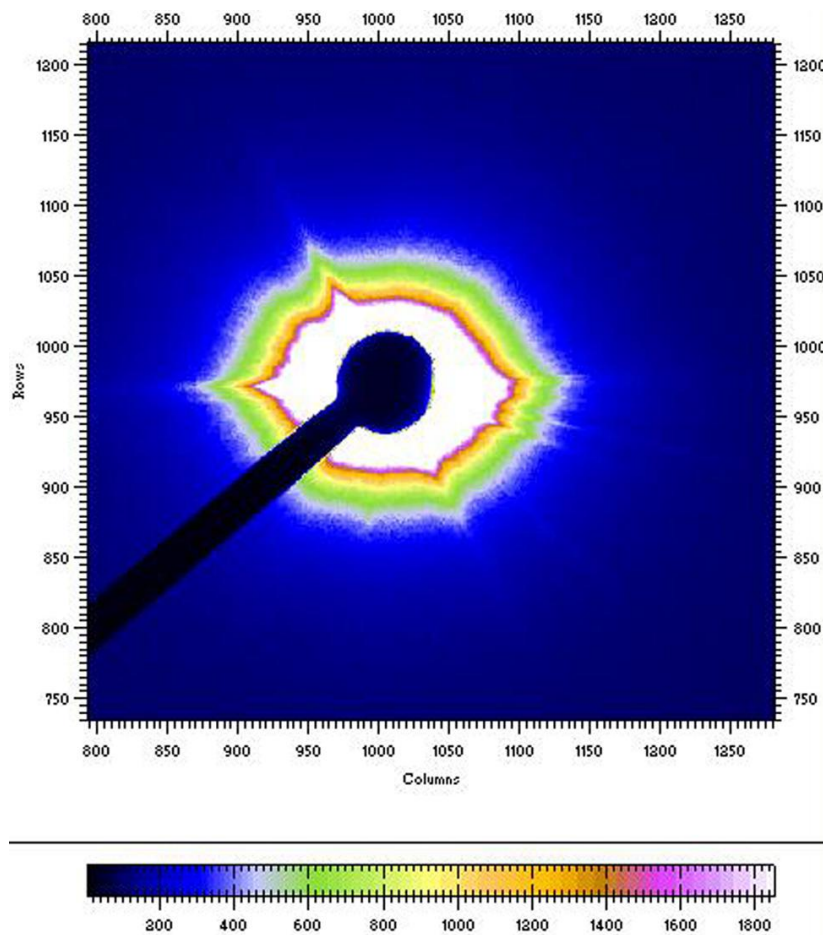

Fig. S4 Two-dimensional SAXS patterns of HPA-Mn anode.

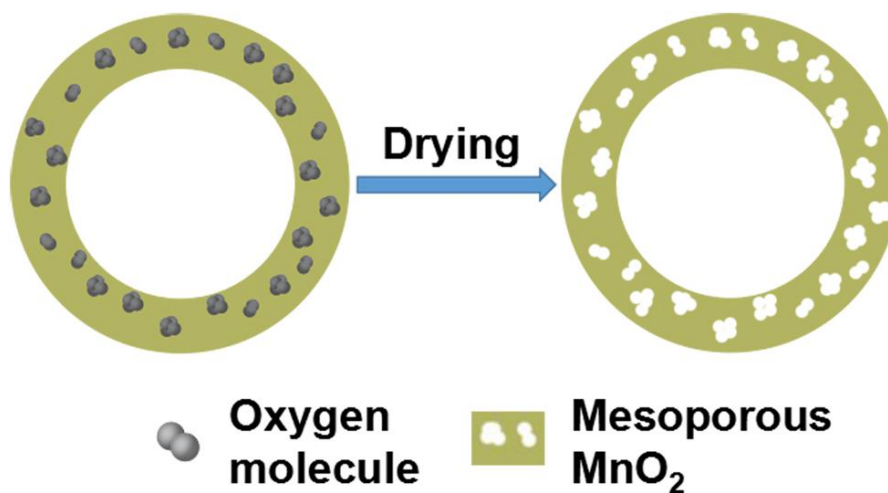

Fig. S5 Schematic representation of the mesoporous formation assisted by oxygen.

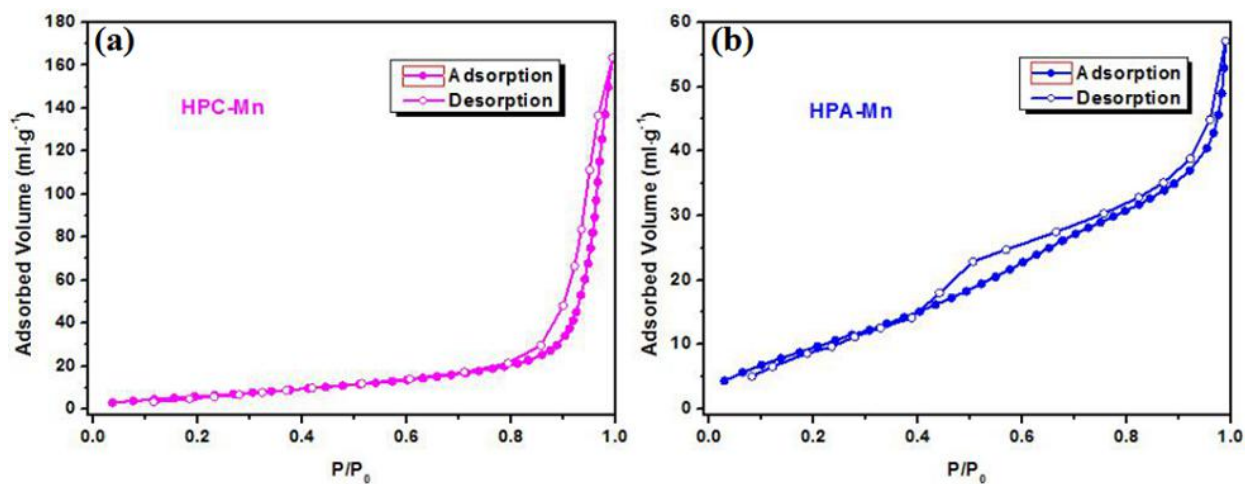

Fig. S6  $\text{N}_2$  adsorption-desorption isotherms of (a) HPC-Mn anode and (b) HPA-Mn anode.

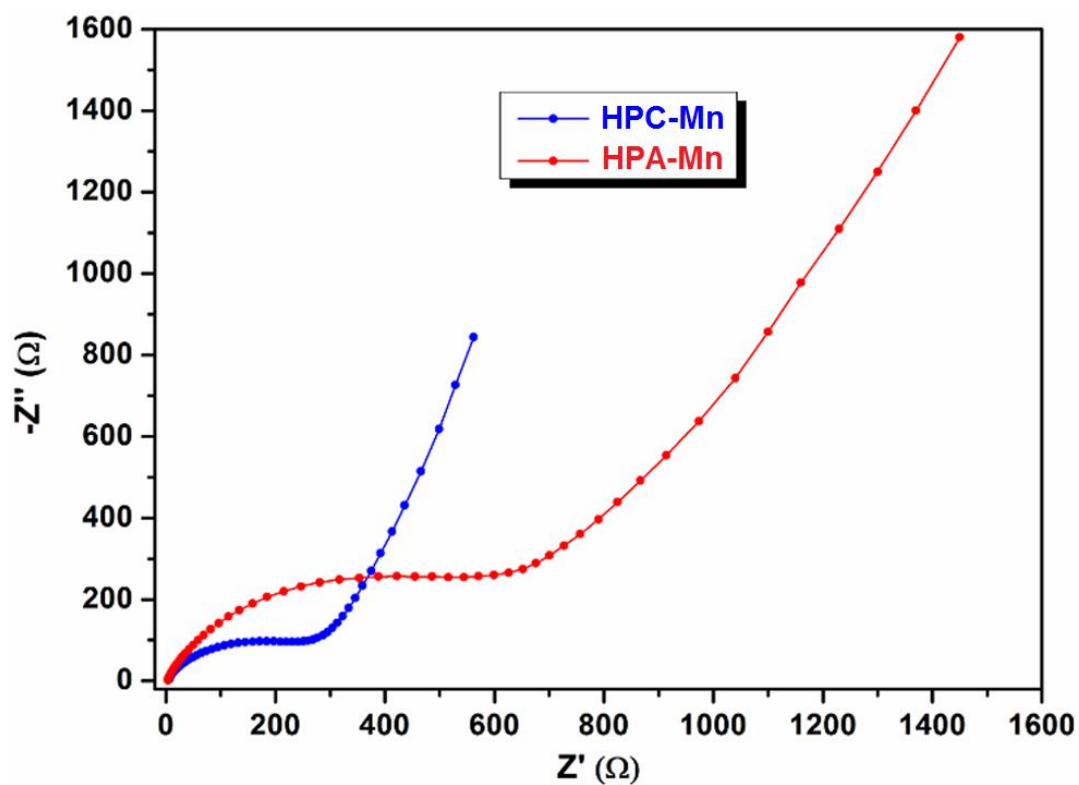

Fig. S7 Nyquist plots of HPC-Mn and HPA-Mn anodes.

**Table S1** Rate performance comparison of the HPC-Mn and other reported MnO<sub>2</sub>-based anodes for

LIBs.

| <b>MnO<sub>2</sub> Based Anodes</b>                              | <b>Low Current Density (A g<sup>-1</sup>) Capacity (mAh g<sup>-1</sup>)</b> | <b>High Current Density (A g<sup>-1</sup>) Capacity (mAh g<sup>-1</sup>)</b> | <b>Current Density Ratio</b> | <b>Capacity Retention (%)</b> | <b>Ref.</b> |
|------------------------------------------------------------------|-----------------------------------------------------------------------------|------------------------------------------------------------------------------|------------------------------|-------------------------------|-------------|
| HPC-Mn                                                           | 0.1 (973.8)                                                                 | 2.0 (798.8)                                                                  | 20                           | ~82.0                         | Our Work    |
| MnO <sub>2</sub> /3D porous graphene                             | 0.1 (926.0)                                                                 | 1.6 (433.0)                                                                  | 16                           | ~46.8                         | 1           |
| MnO <sub>2</sub> network-Ni/PVDF double shell/core fiber         | 0.05 (1079.0)                                                               | 0.6 (544.7)                                                                  | 12                           | ~50.5                         | 2           |
| MnO <sub>2</sub> @N-doped carbon nanotubes                       | 0.05 (1146.0)                                                               | 1.0 (620.7)                                                                  | 20                           | ~54.2                         | 3           |
| Freestanding MnO <sub>2</sub> /Ni /PVDF coaxial fiber            | 0.05 (1178.4)                                                               | 1.0 (415.0)                                                                  | 20                           | ~35.2                         | 4           |
| MnO <sub>2</sub> on 3D N-doped graphene hybrid aerogels          | 0.1 (1003.0)                                                                | 1.5 (636.0)                                                                  | 15                           | ~63.4                         | 5           |
| MnO <sub>2</sub> nanoflakes on reduced graphene oxide nanosheets | 0.1 (1430.0)                                                                | 2.0 (1000.0)                                                                 | 20                           | ~69.9                         | 6           |
| Nanoflaky MnO <sub>2</sub> on carbon microbeads                  | 0.1 (700.0)                                                                 | 1.5 (230.0)                                                                  | 15                           | ~32.9                         | 7           |
| Mesoporous MnO <sub>2</sub> nanosheet arrays                     | 0.1 (-)                                                                     | 1.0 (-)                                                                      | 10                           | ~50.0                         | 8           |
| Nanoflaky MnO <sub>2</sub> /carbon nanotube                      | 0.2 (820.0)                                                                 | 2.0 (420.0)                                                                  | 10                           | ~51.2                         | 9           |

**Table S2** Cycling performance comparison of the HPC-Mn and other reported MnO<sub>2</sub>-based anodes for LIBs.

| MnO <sub>2</sub> Based Anodes                                    | Current Density (A g <sup>-1</sup> ) | Cycling Number | Specific Capacity (mA h g <sup>-1</sup> ) After Cycling | Capacity Retention (%) | Ref.     |
|------------------------------------------------------------------|--------------------------------------|----------------|---------------------------------------------------------|------------------------|----------|
| HPC-Mn                                                           | 0.4                                  | 200            | 778.0                                                   | ~97.6                  | Our Work |
| MnO <sub>2</sub> /3D porous graphene                             | 0.1                                  | 100            | 836.0                                                   | ~84.6                  | 1        |
| MnO <sub>2</sub> network-Ni/PVDF double shell/core fiber         | 0.2                                  | 70             | 500.2                                                   | -                      | 2        |
| MnO <sub>2</sub> @N-doped carbon nanotubes                       | 0.1                                  | 100            | 1415.0                                                  | >100                   | 3        |
| Freestanding MnO <sub>2</sub> /Ni /PVDF coaxial fiber            | 0.05                                 | 70             | 1031.2                                                  | -                      | 4        |
| MnO <sub>2</sub> on 3D N-doped graphene hybrid aerogels          | 0.4                                  | 200            | 909.0                                                   | >100                   | 5        |
| MnO <sub>2</sub> nanoflakes on reduced graphene oxide nanosheets | 1.0                                  | 200            | 1000.0                                                  | ~100                   | 6        |
| Nanoflaky MnO <sub>2</sub> on carbon microbeads                  | 0.1                                  | 100            | 525.0                                                   | -                      | 7        |
| Mesoporous MnO <sub>2</sub> nanosheet arrays                     | 1.0                                  | 200            | 900.0                                                   | >100                   | 8        |
| Nanoflaky MnO <sub>2</sub> /carbon nanotube                      | 0.2                                  | 50             | 620.0                                                   | ~77.0                  | 9        |

**Note:** The specific capacities of some MnO<sub>2</sub> based anodes would increase with the increase of cycling number, so the capacity retention is >100%.

### References:

- 1 Y. Y. Li, Q. W. Zhang, J. L. Zhu, X. L. Wei and P. K. Shen, *J. Mater. Chem. A*, 2014, **2**, 3163.
- 2 Y. Zhang, Q. Xiao, G. Lei and Z. Li, *Phys. Chem. Chem. Phys.*, 2015, **17**, 18699.
- 3 J. Yue, X. Gu, X. L. Jiang, L. Chen, N. N. Wang, J. Yang and X. J. Ma, *Electrochim. Acta*, 2015, **182**, 676.

- 4 Y. Zhang, Z. P. Luo, Q. Z. Xiao, T. L. Sun, G. T. Lei, Z. H. Li and X. J. Li, *J. Power Sources*, 2015, **297**, 442.
- 5 Z. Y. Sui, C. Wang, K. Shu, Q. S. Yang, Y. Ge, G. G. Wallace and B. H. Han, *J. Mater. Chem. A*, 2015, **3**, 10403.
- 6 Y. Cao, X. Lin, C. Zhang, C. Yang, Q. Zhang, W. Hu, M. Zheng and Q. Dong, *RSC Adv.*, 2014, **4**, 30150.
- 7 H. Wang, J. Liu, X. Wang, C. Wu, Q. Zhao, Y. Fu, X. Yang and H. Shu, *RSC Adv.*, 2014, **4**, 22241.
- 8 M. Kundu, C. C. A. Ng, D. Y. Petrovykh and L. F. Liu, *Chem. Commun.*, 2013, **49**, 8459.
- 9 H. Xia, M. O. Lai and L. Lu, *J. Mater. Chem.*, 2010, **20**, 6896.
